# Supplementary material for: A multiplexed ion-exchange membrane-based miRNA (MIX·miR) detection platform for rapid diagnosis of myocardial infarction
Source: Royal Society of Chemistry journal article supplement (doi:10.1039/d1lc00685a), 2021-01-01
Supplement: d1lc00685a1.pdf [file d1lc00685a1.pdf]

## Supplementary Information

### A Multiplexed ion-exchange membrane-based miRNA (MIX.miR) detection platform for rapid diagnosis of myocardial infarction

Xiang Ren<sup>†</sup>, Bradley W. Ellis<sup>†</sup>, George Ronan<sup>†</sup>, Stuart Ryan Blood<sup>‡</sup>, Cameron DeShetler<sup>‡</sup>, Satyajyoti Senapati<sup>‡</sup>, Keith L. March<sup>§</sup>, Eileen, Handberg<sup>§</sup>, David Anderson<sup>§</sup>, Carl Pepine<sup>§</sup>, Hsueh-Chia Chang<sup>†‡</sup>, Pinar Zorlutuna<sup>†‡\*</sup>

<sup>†</sup> Department of Aerospace and Mechanical Engineering, University of Notre Dame, Notre Dame, IN 46556

<sup>‡</sup> Department of Chemical and Biomolecular Engineering, University of Notre Dame, Notre Dame, IN 46556

<sup>§</sup> Division of Cardiology, Department of Medicine in the College of Medicine, University of Florida, Gainesville, FL 32611

#### 1. Integration board

The layout of the MIX.miR sensor integration board is shown in Figure S1.

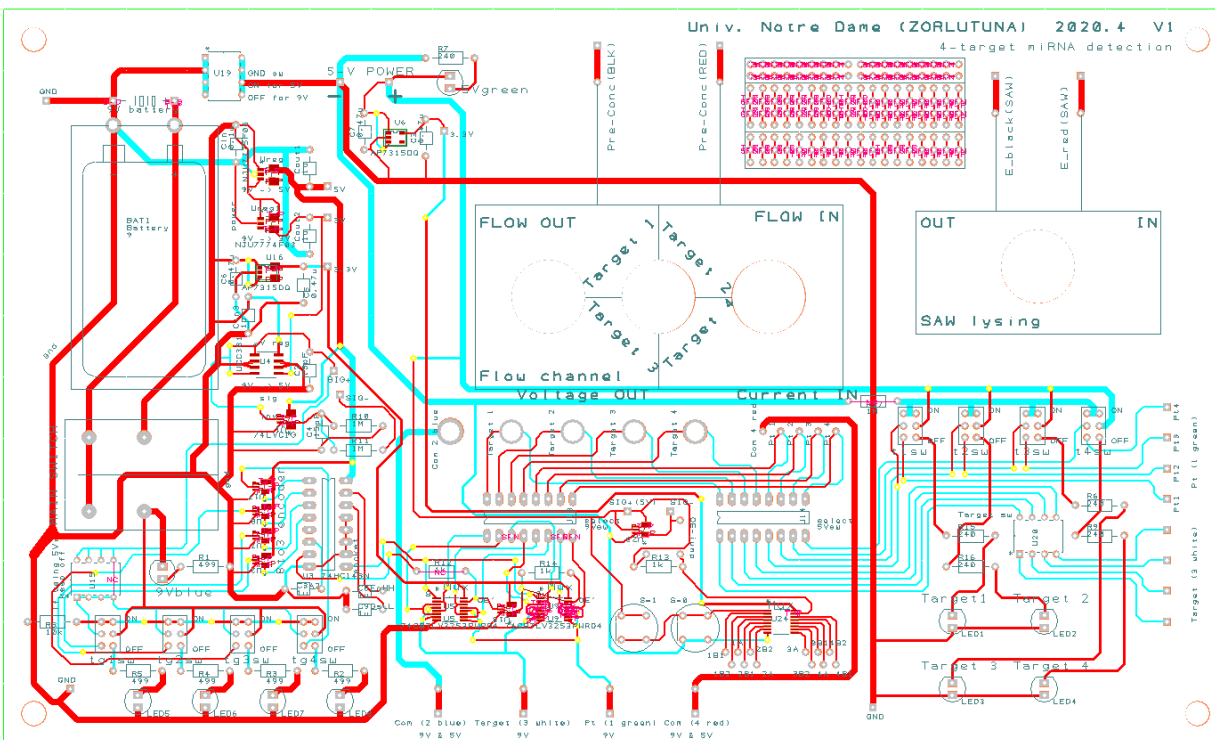

Figure S1. The layout design of the integration board.

## 2. miRNA isolation efficiency in PCR

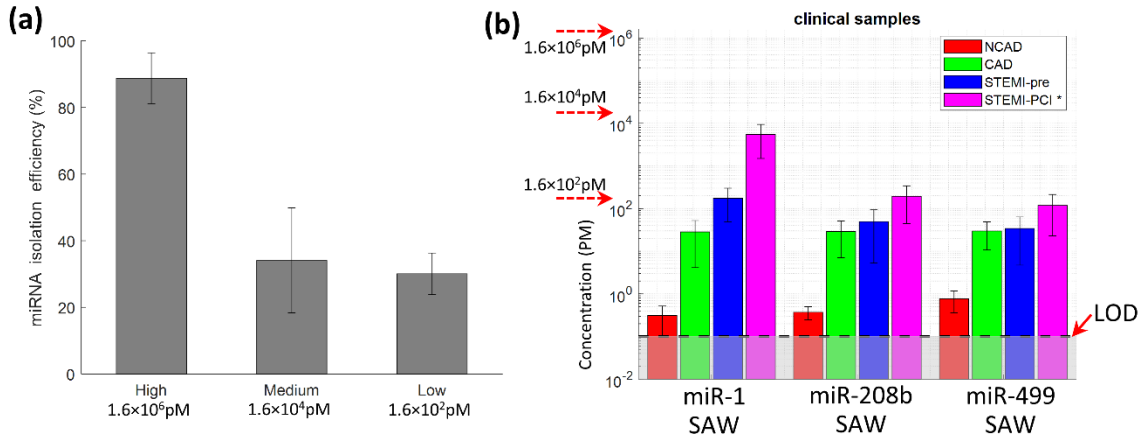

Figure S2. (a) The isolation efficiency of different concentrations of miRNA; (b) the isolation concentrations (high, medium, low) compared with the miRNA measurement by the MIX.miR sensors.

The efficiency was observed to be much higher (~88%) at high concentrations ( $1.6 \mu\text{M}$ ) whereas at lower concentrations ( $16 \text{ nM}$  and  $160 \text{ pM}$ ) efficiency dropped to below 50% and 40%, respectively. Compared with the concentrations of miR-1, miR-208b and miR-499 measured by MIX.miR, the concentration of miR-1 is much higher than miR-208b and miR-499. For example, the highest miR-1 concentration in STEMI-PCI samples is within the  $16 \text{ nM}$  range, while the highest miR-208b and miR-499 are within the  $160 \text{ pM}$  range. During PCR, miR-208b and miR-499 will face a much higher loss than miR-1. Therefore, the miR-208b and miR-499 are not detectable by PCR. The MIX.miR doesn't require miRNA isolation during the experiments, which won't face the issue of miRNA loss.
